# Supplementary material for: High-entropy alloy superconductors on an α-Mn lattice
Source: Royal Society of Chemistry journal article supplement (doi:10.1039/c8tc03337d), 2018-01-01
Supplement: c8tc03337d1.pdf [file c8tc03337d1.pdf]

## Supporting Information for

### High-Entropy Alloy Superconductors on an $\alpha$ -Mn lattice

Karoline Stolze, F. Alex Cevallos, Tai Kong and Robert J. Cava

*Department of Chemistry, Princeton University, Princeton, New Jersey 08544, USA*

\*kstolze@princeton.edu

#### SEM images of $(\text{HfTaWPt})_{0.40}[\text{Re}]_{0.60}$

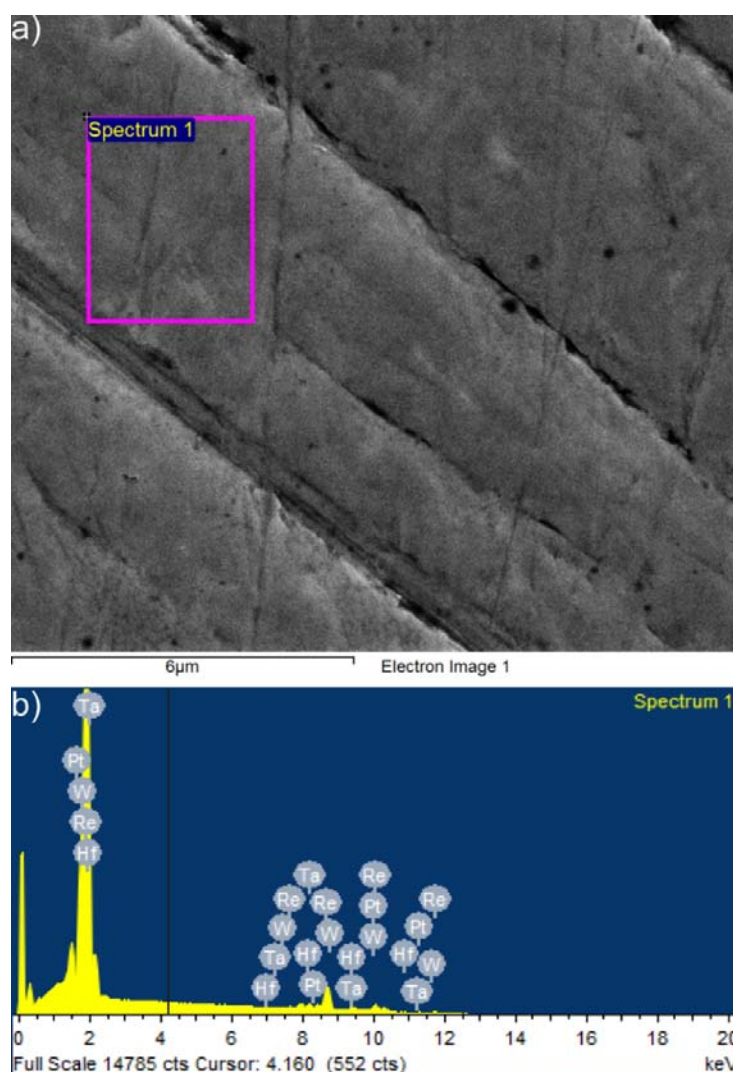

**Figure S1.** a) SEM image of the smooth surface of an as-cast, sanded  $(\text{HfTaWPt})_{0.40}[\text{Re}]_{0.60}$  sample; b) EDX spectrum of an area, emphasized in a), revealing all five elements present with stoichiometry in agreement with the initial composition.

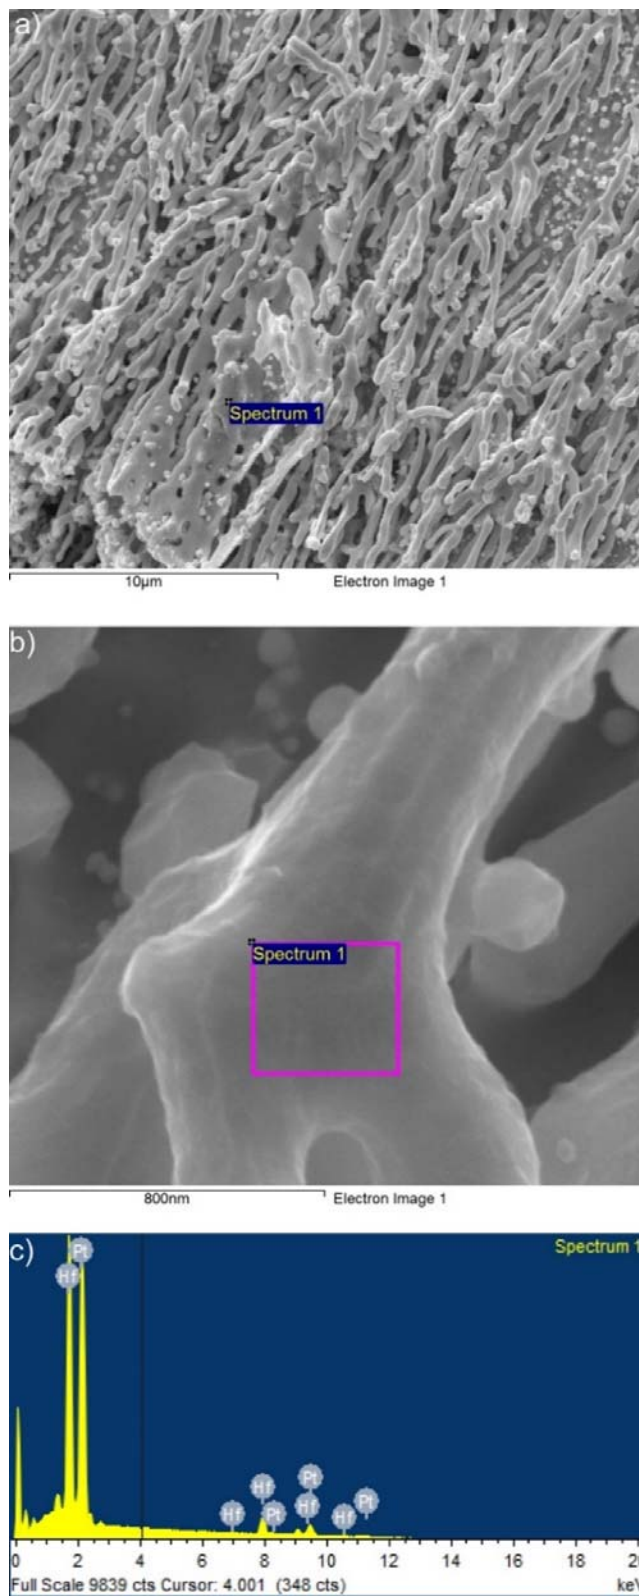

**Figure S2.** a) SEM image of the dendritic surface of a decomposed  $(\text{HfTaWPt})_{0.40}[\text{Re}]_{0.60}$  sample; b) SEM image with increased magnification of a sub-microscale dendrite; c) EDX spectrum of a selected area, emphasized in b), revealing a Hf/Pt-rich composition.

## Heat capacity parameterization

The temperature dependent specific heat capacity can be expressed by the equation

$$\frac{c(T)}{T} = \gamma + \beta T^2 \quad (1),$$

where  $\gamma T$  describes the electronic and  $\beta T^3$  the phonon contribution to the heat capacity. The Sommerfeld parameter  $\gamma$ , and  $\beta$ , can be determined by the linear fit of the  $C/T$  vs.  $T^2$  of the normal-state data collected with an applied magnetic field of 9 T (Figure S3a–c). The Debye temperature  $\Theta_D$  was calculated using  $\beta$  according to the equation

$$\Theta_D = \left( \frac{12\pi^4}{5\beta} nR \right)^{\frac{1}{3}} \quad (2),$$

where the number of atoms per formula unit is  $n = 1$  and the gas constant  $R = 8.314 \text{ Jmol}^{-1}\text{K}^{-1}$ . The Debye temperatures for  $(\text{ZrNb})_{0.10}[\text{MoReRu}]_{0.90}$ ,  $(\text{HfTaWIr})_{0.40}[\text{Re}]_{0.60}$ , and  $(\text{HfTaWPt})_{0.40}[\text{Re}]_{0.60}$  amount to 339 K, 317 K, and 252 K, respectively. The heat capacity parameterization for all three HEAs are summarized in Table S1.

## Resistivity and upper critical fields

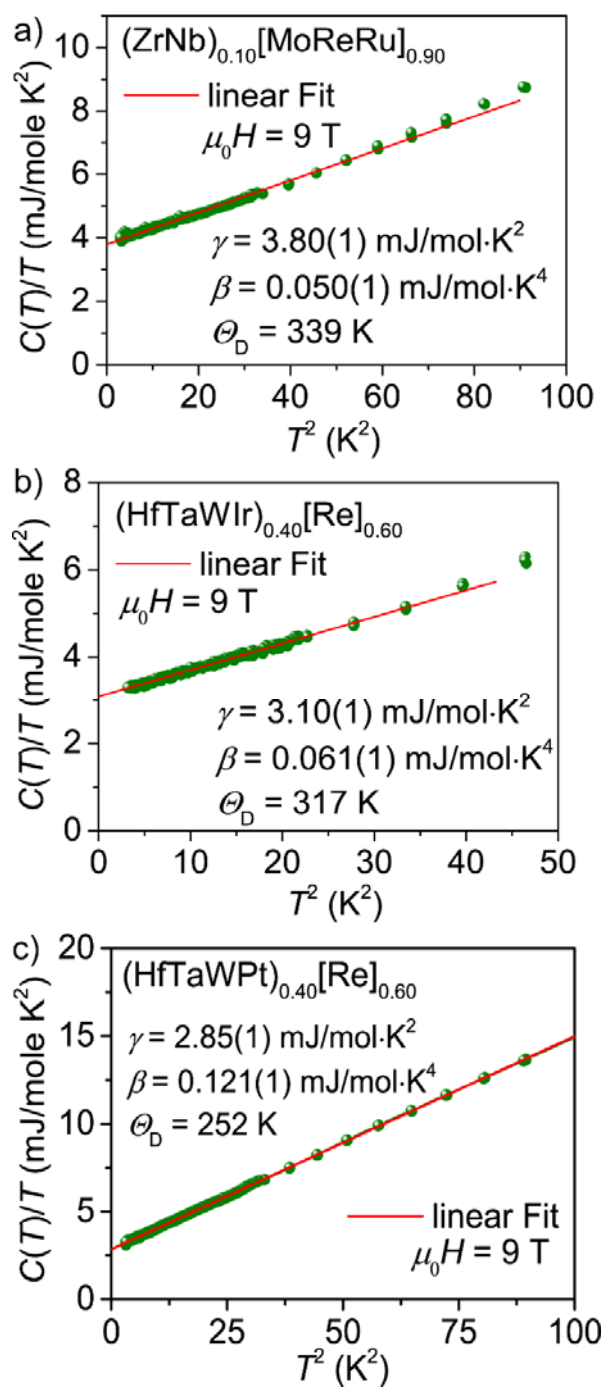

**Figure S3.**  $C/T$  vs.  $T^2$  for a)  $(\text{ZrNb})_{0.10}[\text{MoReRu}]_{0.90}$ , b)  $(\text{HfTaWIr})_{0.40}[\text{Re}]_{0.60}$ , and c)  $(\text{HfTaWPt})_{0.40}[\text{Re}]_{0.60}$  measured in  $\mu_0 H = 9\text{ T}$  (normal state) fitted to  $C/T = \gamma + \beta T^2$  (red line).

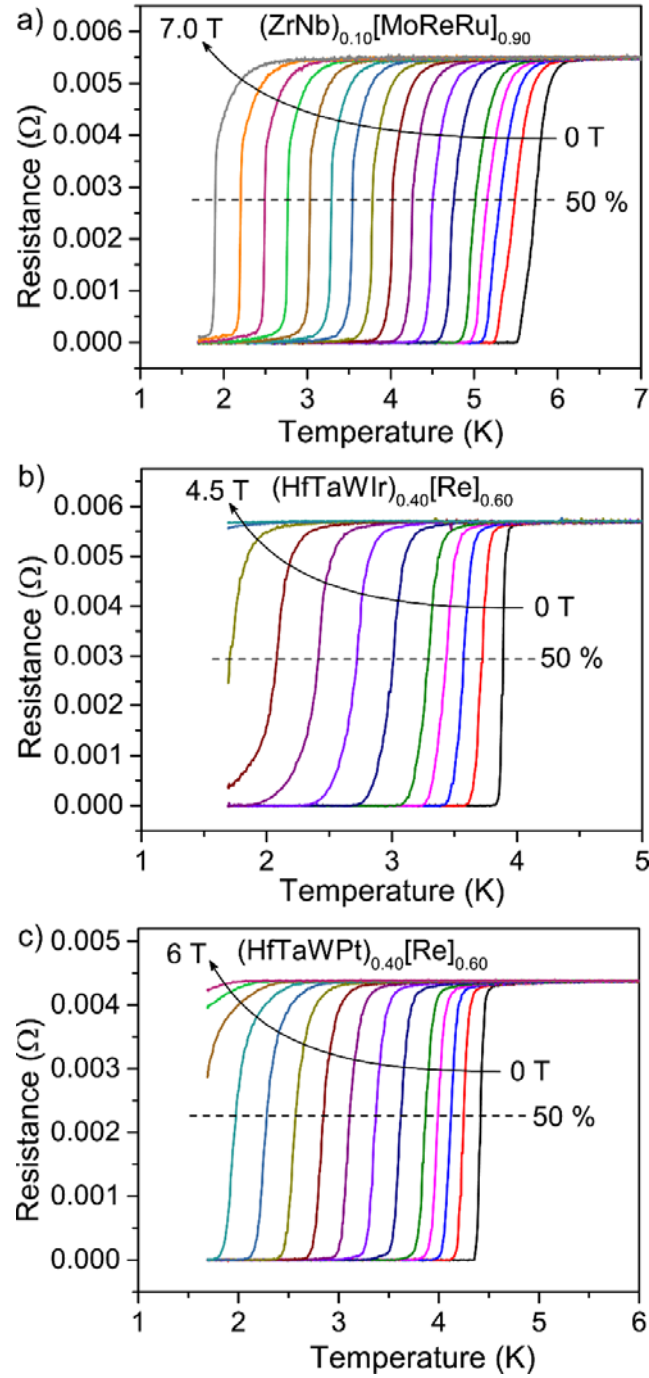

**Figure S4.** Magnetic field dependence of the superconducting transition for a)  $(\text{ZrNb})_{0.10}[\text{MoReRu}]_{0.90}$ , b)  $(\text{HfTaWIr})_{0.40}[\text{Re}]_{0.60}$ , and c)  $(\text{HfTaWPt})_{0.40}[\text{Re}]_{0.60}$  for  $0 \text{ T} \leq \mu_0 H \leq 7.5 \text{ T}$ ,  $0 \text{ T} \leq \mu_0 H \leq 4.5 \text{ T}$ , and  $0 \text{ T} \leq \mu_0 H \leq 6 \text{ T}$  respectively; 50%-criterion depicted as black dashed lines.

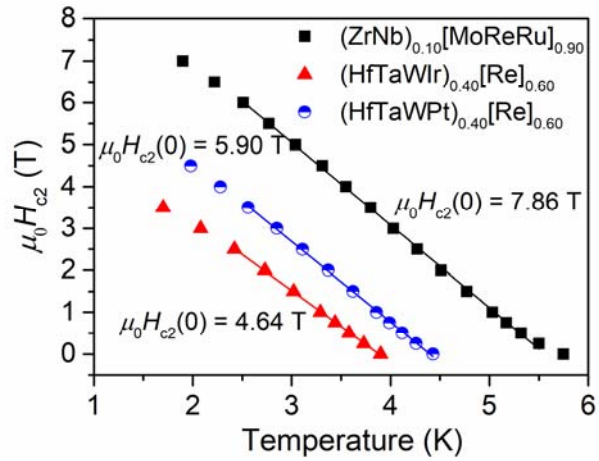

**Figure S5.** Temperature dependent upper critical fields  $\mu_0 H_{c2}(T)$  of  $(\text{ZrNb})_{0.10}[\text{MoReRu}]_{0.90}$ ,  $(\text{HfTaWIr})_{0.40}[\text{Re}]_{0.60}$ , and  $(\text{HfTaWPt})_{0.40}[\text{Re}]_{0.60}$  HEAs. The open circles are the 50%-values obtained from  $\rho(T)$  plots at different applied fields; the lines show the linear fits used to determine  $\mu_0 H_{c2}(0)$  according to the WHH approximation.

The linear regression gave very good fits to all experimental data ( $R^2$ : 0.9997, 0.9991, and 0.9994 for  $(\text{ZrNb})_{0.10}[\text{MoReRu}]_{0.90}$ ,  $(\text{HfTaWIr})_{0.40}[\text{Re}]_{0.60}$ , and  $(\text{HfTaWPt})_{0.40}[\text{Re}]_{0.60}$ , respectively). The new  $\alpha$ -Mn-type HEA  $(\text{ZrNb})_{0.10}[\text{MoReRu}]_{0.90}$  exhibits the highest  $T_c \approx 5.3$  K as well as the highest zero temperature upper critical field  $\mu_0 H_{c2}(0) = 7.86$  T among the materials studied here.

**Table S1.** Overview of the superconducting parameters obtained from susceptibility, specific heat and resistivity measurements for the  $(\text{ZrNb})_{0.10}[\text{MoReRu}]_{0.90}$ ,  $(\text{HfTaWIr})_{0.40}[\text{Re}]_{0.60}$ , and  $(\text{HfTaWPt})_{0.40}[\text{Re}]_{0.60}$  HEA superconductors.

| Parameter                                                      | $(\text{ZrNb})_{0.10}[\text{MoReRu}]_{0.90}$ | $(\text{HfTaWIr})_{0.40}[\text{Re}]_{0.60}$ | $(\text{HfTaWPt})_{0.40}[\text{Re}]_{0.60}$ |
|----------------------------------------------------------------|----------------------------------------------|---------------------------------------------|---------------------------------------------|
| $T_c$ , magnetization (K)                                      | 5.3                                          | 4.0                                         | 4.4                                         |
| $T_c$ , specific heat (K)                                      | 5.3                                          | 4.0                                         | 4.4                                         |
| $T_c$ , resistivity (K)                                        | 5.74                                         | 3.90                                        | 4.43                                        |
| $\gamma$ ( $\text{mJ}\cdot\text{mol}^{-1}\cdot\text{K}^{-2}$ ) | 3.80(1)                                      | 3.10(1)                                     | 2.85(1)                                     |
| $\beta$ ( $\text{mJ}\cdot\text{mol}^{-1}\cdot\text{K}^{-4}$ )  | 0.050(1)                                     | 0.061(1)                                    | 0.121(1)                                    |
| $\Theta_b$ (K)                                                 | 339                                          | 317                                         | 252                                         |
| $\Delta C/\gamma T_c$                                          | 1.53                                         | 1.46                                        | 1.46                                        |
| $\rho_{300\text{K}}$ ( $\mu\Omega\cdot\text{cm}$ )             | 105                                          | 536                                         | 591                                         |
| RRR                                                            | 1.02                                         | 1.01                                        | 1.01                                        |
| $\mu_0 H_{c2}(0)$ (T)                                          | 7.86                                         | 4.64                                        | 5.90                                        |
